# Supplementary material for: Role of Arginase 2 in Systemic Metabolic Activity and Adipose Tissue Fatty Acid Metabolism in Diet-Induced Obese Mice
Source: PubMed Central journal article supplement (PMC6472154; doi:10.3390/ijms20061462), 2019-03-22
Supplement: ijms-20-01462-s001.pdf [file ijms-20-01462-s001.pdf]

## Role of arginase 2 in systemic metabolic activity and adipose tissue fatty acid metabolism in diet-induced obese mice

Reem T. Atawia<sup>1</sup>, Haroldo A. Toque<sup>1,2</sup>, Mohamed M. Meghil<sup>3</sup>, Tyler W. Benson<sup>2</sup>, Nicole K. H. Yiew<sup>1,2,5</sup>, Christopher W. Cutler<sup>3</sup>, Neal L. Weintraub<sup>2</sup>, Ruth B. Caldwell<sup>2,4</sup> and Robert W. Caldwell<sup>1\*</sup>

### Supplementary Materials

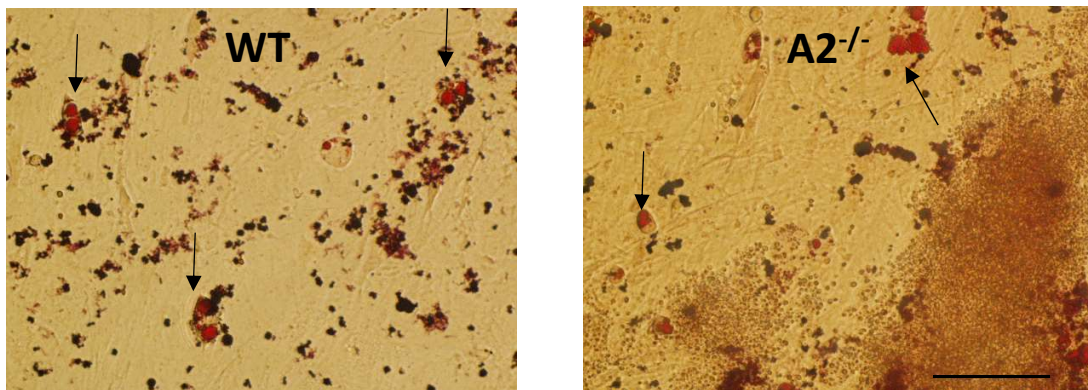

Supplementary Figure S1. Representative Images of cytoplasmic lipid droplets stained with Oil Red O after in vitro differentiation of preadipocytes from SVF of VAT, ( ), scale bar=50  $\mu$ m

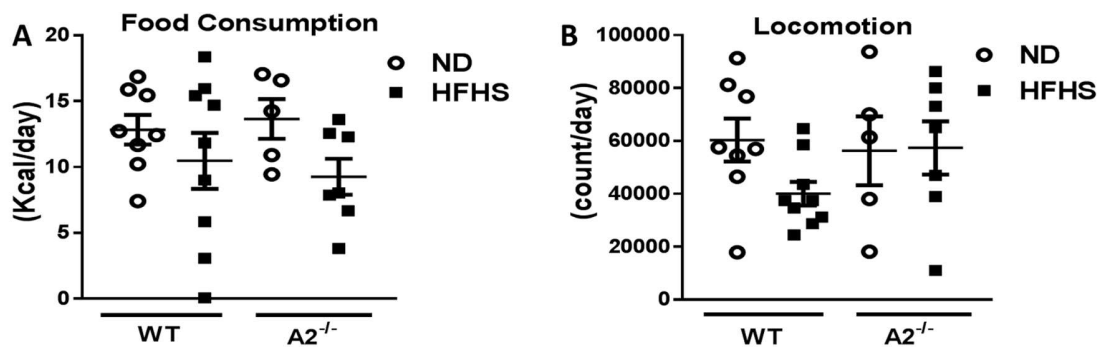

Supplementary Figure S2. Effect of HFHS on food intake calculated as kcal of food consumed/day (A) and locomotor activity calculated as steps/day (B) in WT and A2<sup>-/-</sup> mice. Values are means  $\pm$  SEM, n=5-9 per group.

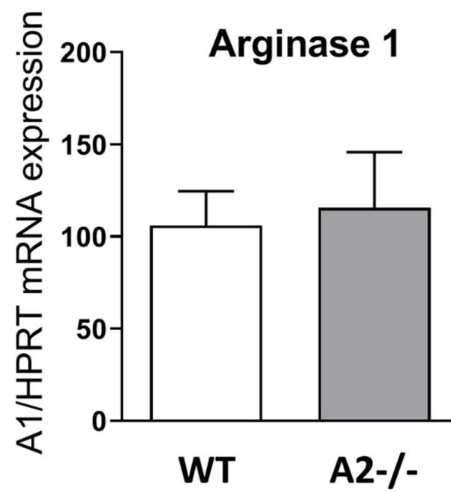

**Supplementary Figure S3.** Arginase 1 (A1) mRNA expression levels in adipocytes isolated from WT mice and mice globally lacking arginase 2 (A2<sup>-/-</sup>) fed HFHS diet for 16 weeks, determined by RT-PCR and normalized to hypoxanthine phosphoribosyl transferase (HPRT) expression. Data are presented as means ± SEM, n =6-7 per group.

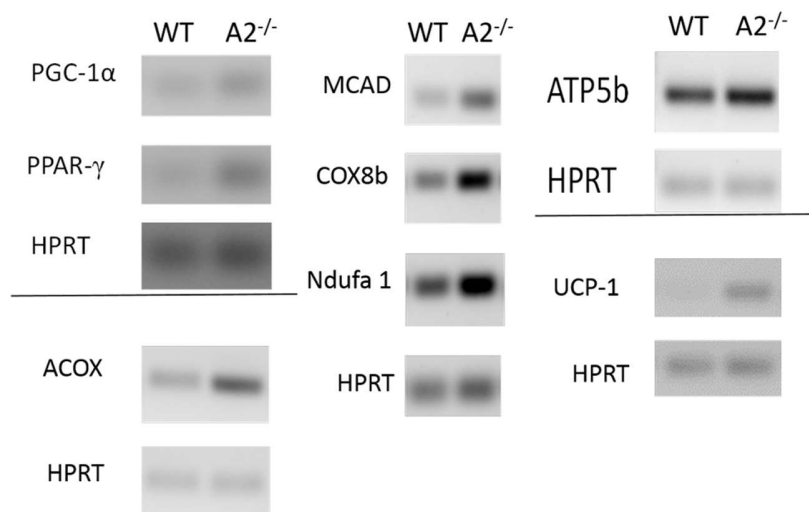

**Supplementary Figure S4.** Representative agarose gel electrophoresis of RT-PCR products of genes involved in fatty acid oxidation in adipocytes isolated from WT mice and mice globally lacking arginase 2 (A2<sup>-/-</sup>) on high fat-high sucrose (HFHS) for 16 weeks and normalized to hypoxanthine phosphoribosyl transferase (HPRT) expression
